# Supplementary material for: Individual Quality of Life and the Environment – Towards a Concept of Liveable Areas for Persons with Disabilities in Poland
Source: Research Square preprint supplement (doi:10.21203/rs.3.rs-126451/v1), 2020-12-21
Supplement: Supplementary file 1 [file aac5492fb1fb7bf4c34d1e04.docx]

**Individual Quality of Life and the Environment – Towards a Concept of Liveable Areas for Persons with Disabilities in Poland**

Izabela Grabowska*, PhD, igrabow@sgh.waw.pl, SGH Warsaw School of Economics, Institute of Statistics and Demography, Warsaw, Poland – corresponding author, IG

Radosław Antczak, PhD, rantcza@sgh.waw.pl, SGH Warsaw School of Economics, Institute of Statistics and Demography, Warsaw, Poland, RA

Jan Zwierzchowski, PhD, jzwier@sgh.waw.pl, SGH Warsaw School of Economics, Institute of Statistics and Demography, Warsaw, Poland, JZ

Tomasz Panek, Professor, tompa10@interia.pl, SGH Warsaw School of Economics, Institute of Statistics and Demography, Warsaw, Poland, TP

**Annex 2. Results of the MIMIC model for all QoL dimensions**

| **Material conditions** | | | | | | |
| --- | --- | --- | --- | --- | --- | --- |
| Structural part |  | **Variable** | **Coefficient** | **Std. Err.** | **z** | **P>|z|** |
| Productivity | 0,42193 | 0,70315 | 0,600057 | 0,548468 |
| Health | -0,10018 | 0,82252 | -0,1218 | 0,90306 |
| Education | 0,3032 | 0,49733 | 0,609656 | 0,54209 |
| Age | 0,20089 | 0,20182 | 0,995392 | 0,319546 |
| Household size | -0,28209 | 0,28335 | -0,99555 | 0,319467 |
| Measurement part | **Equation** | **Variable** | **Coefficient** | **Std.Err.** | **z** | **P>|z|** |
| Median disposable equivalised income | Material_conditions | 0,66373 | 0,26045 | 2,548397 | 0,010822 |
| Constant term | 1,51087 | 0,92292 | 1,637054 | 0,101619 |
| At-risk-of poverty rate | Material_conditions | 0,76554 | 0,13006 | 5,886053 | 3,96E-09 |
| Constant term | 0,16455 | 0,57027 | 0,288548 | 0,772928 |
| At-risk-of poverty rate anchored at a fixed moment in time | Material_conditions | 0,60835 | 0,2108 | 2,885911 | 0,003903 |
| Constant term | 0,33382 | 0,722 | 0,462355 | 0,643827 |
| Satisfaction with financial situation | Material_conditions | 0,60394 | 0,19412 | 3,111168 | 0,001863 |
| Constant term | 0,29686 | 0,55939 | 0,530685 | 0,595637 |
| Severe material deprivation rate | Material_conditions | 0,87951 | 0,81915 | 1,073686 | 0,282963 |
| Constant term | 0,5425 | 0,37834 | 1,433895 | 0,151602 |
| (In) ability to make ends meet | Material_conditions | -0,81455 | 0,53342 | -1,52703 | 0,126753 |
| Constant term | 1,87939 | 0,24383 | 7,707788 | 1,29E-14 |
| Structural problems of the dwelling | Material_conditions | 0,58228 | 0,81562 | 0,713911 | 0,475282 |
| Structural problems of the dwelling | Constant term | 0,28574 | 0,08253 | 3,462256 | 0,000536 |
| Space of dwelling overcrowding/under-occupation | Material_conditions | 0,39416 | 0,23506 | 1,676848 | 0,093572 |
| Space of dwelling overcrowding/under-occupation | Constant term | 0,77324 | 0,76129 | 1,015697 | 0,309774 |
| **Productivity** | | | | | | |
| Structural part |  | **Variable** | **Coefficient** | **Std. Err.** | **z** | **P>|z|** |
| Health | -0,14773 | 0,3706 | -0,39862 | 0,69017 |
| Education | -0,11729 | 0,00596 | -19,6795 | 3,23E-86 |
| Sex | 0,02258 | 0,15244 | 0,148124 | 0,882245 |
| Student | -0,44483 | 0,29382 | -1,51395 | 0,130037 |
| Age | -0,05734 | 0,02385 | -2,40419 | 0,016208 |
| Big city | 0,01358 | 0,00585 | 2,321368 | 0,020267 |
| Medium town | 0,02202 | 0,03108 | 0,708494 | 0,478638 |
| Small town | 0,0228 | 0,0455 | 0,501099 | 0,616302 |
| Rural | -0,01153 | 0,10231 | -0,1127 | 0,910271 |
| Health limitations | 0,16718 | 0,31809 | 0,525575 | 0,599184 |
| Penioner | -0,68495 | 0,27161 | -2,52181 | 0,011675 |
| Disability pensioner | -0,32721 | 0,4021 | -0,81375 | 0,415787 |
| Household size | 0,00338 | 0,37962 | 0,008904 | 0,992896 |
| Presence of the partner | 0,0873 | 0,33411 | 0,261291 | 0,793868 |
| Unemployed | -0,38763 | 0,85907 | -0,45122 | 0,651831 |
| Inactive | -0,42016 | 0,13864 | -3,03058 | 0,002441 |
| Measurment part | **Equation** | **Variable** | **Coefficient** | **Std. Err.** | **z** | **P>|z|** |
| Employment rate | Productivity | 0,89025 | 0,14051 | 6,335848 | 2,36E-10 |
| Constant term | 0,73264 | 0,09934 | 7,375075 | 1,64E-13 |
| Unemployment rate | Productivity | -0,29124 | 0,8398 | -0,3468 | 0,728744 |
| Constant term | 0,20025 | 0,51302 | 0,390336 | 0,696288 |
| Long-term unemployment rate | Productivity | -0,23384 | 0,66232 | -0,35306 | 0,724042 |
| Constant term | 0,16333 | 0,21712 | 0,752257 | 0,451897 |
| People living in households with very low work intensity | Productivity | 0 | 0 | 0,01 | 0,992021 |
| Constant term | 0,000099 | 0,000041 | 2,414634 | 0,015751 |
| Underemployed part-time workers | Productivity | 0,1863 | 0,39375 | 0,473143 | 0,636111 |
| Constant term | 0,16361 | 0,91417 | 0,178971 | 0,85796 |
| Low-wage earners | Productivity | 0,51634 | 0,42894 | 1,203758 | 0,228683 |
| Constant term | 0,52894 | 0,51063 | 1,035858 | 0,300269 |
| Long working hours (more than 48 at week) | Productivity | -0,10875 | 0,03787 | -2,87167 | 0,004083 |
| Constant term | 0,87345 | 0,74687 | 1,169481 | 0,24221 |
| Job satisfaction | Productivity | 0,90188 | 0,14505 | 6,217718 | 5,04E-10 |
| Constant term | 0,89963 | 0,7849 | 1,146171 | 0,251724 |
| **Health** | | | | | | |
| Structural part |  | **Variable** | **Coefficient** | **Std.Err.** | **z** | **P>|z|** |
| Education | -0,25852 | 0,64496 | -0,40083 | 0,688545 |
| Sex | 0,03902 | 0,02342 | 1,666097 | 0,095694 |
| Age | -0,23201 | 0,18302 | -1,26768 | 0,204914 |
| Big city | 0,01681 | 0,34063 | 0,04935 | 0,960641 |
| Medium town | 0,04734 | 0,13189 | 0,358935 | 0,719643 |
| Small town | 0,05612 | 0,33566 | 0,167193 | 0,867218 |
| Rural | 0,03893 | 0,55162 | 0,070574 | 0,943737 |
| Pensioner | 0,06179 | 0,25101 | 0,246165 | 0,805554 |
| Disability pensioner | 0,34959 | 0,42589 | 0,820846 | 0,411734 |
| Measurement part | **Equation** | **Variable** | **Coefficient** | **Std.Err.** | **z** | **P>|z|** |
| Self-perceived health | Health | -0,88057 | 0,4016 | -2,19265 | 0,028332 |
| Constant term | 0,8172 | 0,50836 | 1,607522 | 0,10794 |
| Unmet needs for medical care | Health | -0,01992 | 0,97402 | -0,02045 | 0,983683 |
| Constant term | 0,39856 | 0,15817 | 2,51982 | 0,011741 |
| **Education** | | | | | | |
| Structural part |  | **Variable** | **Coefficient** | **Std.Err.** | **z** | **P>|z|** |
| Sex | 0,01445 | 0,0806 | 0,17928 | 0,857718 |
| Student | -0,21624 | 0,14688 | -1,47222 | 0,140961 |
| Age | -0,0538 | 0,51436 | -0,1046 | 0,916696 |
| Big city | -0,04439 | 0,57715 | -0,07691 | 0,938693 |
| Medium town | -0,05482 | 0,4957 | -0,11059 | 0,911941 |
| Small town | -0,18019 | 0,90656 | -0,19876 | 0,842449 |
| Rural | -0,32235 | 0,85965 | -0,37498 | 0,707677 |
| Household size | 0,15654 | 0,19676 | 0,795589 | 0,426271 |
| Measurement part | **Equation** | **Variable** | **Coefficient** | **Std.Err.** | **z** | **P>|z|** |
| Educational attainment | Education | 0,7107 | 0,24015 | 2,9594 | 0,003082 |
| Constant term | 0,3266 | 0,8024 | 0,407029 | 0,683987 |
| Early leavers from education and training | Education | -0,84177 | 0,199 | -4,23 | 2,34E-05 |
| Constant term | 0,24432 | 0,02181 | 11,2022 | 0 |
| **Leisure and social interactions** | | | | | | |
| Structural part |  | **Variable** | **Coefficient** | **Std.Err.** | **z** | **P>|z|** |
| Material_conditions | 0,32095 | 0,01049 | 30,59581 | 0 |
| Productivity | -1,83185 | 0,96176 | -1,90469 | 0,056821 |
| Pensioner | -1,30323 | 0,34784 | -3,74664 | 0,000179 |
| Presence of the partner | 0,25878 | 0,04609 | 5,614667 | 1,97E-08 |
| Inactive | -0,71612 | 0,34644 | -2,06708 | 0,038726 |
| Measurement part | **Equation** | **Variable** | **Coefficient** | **Std.Err.** | **z** | **P>|z|** |
| Non-participation in culture or sport activities | Leisure_Social_Interactions | 0,93655 | 0,15554 | 6,021281 | 1,73E-09 |
| Constant term | 0,20274 | 0,20352 | 0,996167 | 0,319169 |
| Satisfaction with time use | Leisure_Social_Interactions - | -0,27367 | 0,02343 | -11,6803 | 1,61E-31 |
| Constant term | 0,15222 | 0,14505 | 1,049431 | 0,29398 |
| Financial obstacles to leisure participation | Leisure_Social_Interactions | 0,73015 | 0,62372 | 1,170637 | 0,241745 |
| Constant term | 0,23602 | 0,20815 | 1,133894 | 0,256839 |
| Frequency of getting together with friends | Leisure_Social_Interactions - | -0,9232 | 0,15955 | -5,78627 | 7,2E-09 |
| Constant term | 0,05621 | 0,05346 | 1,05144 | 0,293056 |
| Satisfaction with personal relationships | Leisure_Social_Interactions | 0,65663 | 0,35678 | 1,840434 | 0,065705 |
| Constant term | 0,6297 | 0,27457 | 2,293404 | 0,021825 |
| Participation in voluntary activities | Leisure_Social_Interactions | 0,99338 | 0,01111 | 89,41314 | 0 |
| Constant term | 0,52595 | 0,60477 | 0,869669 | 0,384481 |
| Help from others (having someone to rely on in case of need) | Leisure_Social_Interactions | 0,9921 | 0,01853 | 53,54021 | 0 |
| Constant term | 0,52456 | 0,61594 | 0,851641 | 0,394413 |
| Trust in others | Leisure_Social_Interactions - | -0,58101 | 0,45244 | -1,28417 | 0,199082 |
| Constant term | 0,30391 | 0,48545 | 0,626038 | 0,53129 |
| **Economic security and physical safety** | | | | | | |
| Structural part |  | **Variable** | **Coefficient** | **Std.Err.** | **z** | **P>|z|** |
| Material_conditions | -0,89705 | 0,62628 | -1,43235 | 0,152045 |
| Sex | -0,02116 | 0,61728 | -0,03428 | 0,972654 |
| Age | 0,14684 | 0,50394 | 0,291384 | 0,770758 |
| Big city | -0,04141 | 0,44144 | -0,09381 | 0,925263 |
| medium town | -0,04426 | 0,24854 | -0,17808 | 0,85866 |
| Small town | -0,11189 | 0,91877 | -0,12178 | 0,903071 |
| Rural | -0,29155 | 0,44492 | -0,65529 | 0,512283 |
| Presence of the partner | -0,01292 | 0,96981 | -0,01332 | 0,989371 |
| Measurment part | **Equation** | **Variable** | **Coefficient** | **Std.Err.** | **z** | **P>|z|** |
| Perception of crime, violence, and vandalism in the living area | Security_safety | -0,78587 | 0,4893 | -1,60611 | 0,10825 |
| Constant term | 0,68511 | 0,09687 | 7,072468 | 1,52E-12 |
| Population unable to face unexpected financial expenses | Security_safety | 0,3465 | 0,41871 | 0,827542 | 0,40793 |
| Constant term | 0,29515 | 0,04772 | 6,185038 | 6,21E-10 |
| Feeling of safety (people feeling safe when walking alone in their area after dark) | Security_safety | 0,07096 | 0,50923 | 0,139348 | 0,889175 |
| Constant term | 0,24543 | 0,08928 | 2,748992 | 0,005978 |
| Population in arrears | Security_safety | -0,03227 | 0,03521 | -0,9165 | 0,359404 |
| Constant term | 0,13185 | 0,01525 | 8,645902 | 0 |
| **Governance and basic rights** | | | | | | |
| Structural part |  | **Variable** | **Coefficient** | **Std.Err.** | **z** | **P>|z|** |
| Sex | -0,16975 | 0,0214 | -7,93224 | 2,15E-15 |
| Age | -0,08221 | 0,02352 | -3,49532 | 0,000473 |
| Big city | 0,03153 | 0,03306 | 0,953721 | 0,340225 |
| Medium town | 0,04065 | 0,03423 | 1,187555 | 0,235009 |
| Small town | 0,04944 | 0,05719 | 0,864487 | 0,387321 |
| Rural | 0,06889 | 0,05191 | 1,327105 | 0,184474 |
| Measurement part | **Equation** | **Variable** | **Coefficient** | **Std.Err.** | **z** | **P>|z|** |
| Trust in the Parliament | Basic_rights | 2,476419 | 0,03734 | 66,32 | 0 |
| Constant term | 3,148847 | 0,038001 | 82,86 | 0 |
| Trust in the local authorities | Basic_rights | 1,230928 | 0,022863 | 53,84 | 0 |
| Constant term | 2,551202 | 0,019373 | 131,69 | 0 |
| Trust in the government | Basic_rights | 2,524901 | 0,038049 | 66,36 | 0 |
| Constant term | 3,136462 | 0,038734 | 80,97 | 0 |
| Trust in courts | Basic_rights | 1,303944 | 0,023738 | 54,93 | 0 |
| Constant term | 2,606444 | 0,020462 | 127,38 | 0 |
| Trust in the police | Basic_rights | 1 | (constrained) |  |  |
| Constant term | 2,394372 | 0,015991 | 149,74 | 0 |
| Active citizenship | Basic_rights | 0,0193287 | 0,003826 | 5,05 | 0 |
| Constant term | 0,0526302 | 0,001138 | 46,27 | 0 |
| **Natural and living enviroment** | | | | | | |
| Structural part |  | **Variable** | **Coefficient** | **Std.Err.** | **z** | **P>|z|** |
| Big city | 0,14631 | 0,0591 | 2,475635 | 0,0133 |
| Medium town | 0,40195 | 0,159 | 2,527987 | 0,011472 |
| Small town | -0,37712 | 0,16562 | -2,27702 | 0,022785 |
| Rural | -0,9258 | 0,38158 | -2,42623 | 0,015257 |
| Household size | 0,32967 | 0,12842 | 2,567124 | 0,010255 |
| Measurement part | **Equation** | **Variable** | **Coefficient** | **Std.Err.** | **z** | **P>|z|** |
| Perception of pollution, grime, and other environmental problems | Environment | -0,27288 | 0,13162 | -2,07324 | 0,03815 |
| Constant term | 0,29156 | 0,02245 | 12,98708 | 0 |
| Perception of pollution, grime, and other environmental problems | Environment | 0,22551 | 0,10934 | 2,062466 | 0,039163 |
| Constant term | 0,39385 | 0,02236 | 17,61404 | 0 |
| Satisfaction with recreational and green areas | Environment | 0,00 | 0,00 | -0,00068 | 0,999455 |
| Constant term | 0,00001 | 0,000054 | 0,185185 | 0,853084 |
| Satisfaction with living environment | Environment | -0,07891 | 0,03584 | -2,20173 | 0,027684 |
| Constant term | 0,29369 | 0,04691 | 6,260712 | 3,83E-10 |
| **Overall experience of life (subjective wellbeing)** | | | | | | |
| Structural part |  | **Variable** | **Coefficient** | **Std.Err.** | **z** | **P>|z|** |
| Student | 0,0390479 | 0,0055 | 7,1 | 0 |
| Age | -0,0383985 | 0,007949 | -4,83 | 0 |
| Gender | -0,0159984 | 0,004506 | -3,55 | 0 |
| Big city | -0,0319172 | 0,005565 | -5,74 | 0 |
| Medium town | -0,0387427 | 0,00475 | -8,16 | 0 |
| Self perceived health | 0,2443572 | 0,006207 | 39,37 | 0 |
| Monetary_poor | -0,0245198 | 0,00474 | -5,17 | 0 |
| Material deprivation | -0,1661296 | 0,005357 | -31,01 | 0 |
| Unemployed | -0,0398439 | 0,004384 | -9,09 | 0 |
| Retired | 0,0383867 | 0,005485 | 7 | 0 |
| Income | 0,0204196 | 0,005522 | 3,7 | 0 |
| Unmet_medical_needs | -0,0439949 | 0,004214 | -10,44 | 0 |
| Arrears | -0,0461686 | 0,004845 | -9,53 | 0 |
| Crime | -0,0131231 | 0,004733 | -2,77 | 0,006 |
| Household size | 0,0173091 | 0,005489 | 3,15 | 0,002 |
| Measurement part | **Equation** | **Variable** | **Coefficient** | **Std.Err.** | **z** | **P>|z|** |
| Overall life satisfaction | Subjective_wellbeing | 1 | (constrained) |  |  |
| Constant term | 0,0283563 | 0,006953 | 4,08 | 0 |
| Assessing whether life is worthwhile | Subjective_wellbeing | 0,5287069 | 0,012749 | 41,47 | 0 |
| Constant term | 0,0292289 | 0,007641 | 3,83 | 0 |
| Positive affect - full of life | Subjective_wellbeing | 1,093063 | 0,013082 | 83,55 | 0 |
| Constant term | 0,0224684 | 0,006933 | 3,24 | 0,001 |
| Positive affect - calm | Subjective_wellbeing | 0,7752744 | 0,012606 | 61,5 | 0 |
| Constant term | 0,0160439 | 0,007068 | 2,27 | 0,023 |
| Positive affect - happy | Subjective_wellbeing | 1,075263 | 0,013023 | 82,56 | 0 |
| Constant term | 0,0280781 | 0,006911 | 4,06 | 0 |
| Negative affect - depressed | Subjective_wellbeing | -1,00162 | 0,013243 | -75,64 | 0 |
| Constant term | -0,0317269 | 0,006912 | -4,59 | 0 |
| Negative affect - nervous | Subjective_wellbeing | -0,764376 | 0,012782 | -59,8 | 0 |
| Constant term | -0,031396 | 0,007049 | -4,45 | 0 |
| Negative affect - sad | Subjective_wellbeing | -1,018863 | 0,01335 | -76,32 | 0 |
| Constant term | -0,0301737 | 0,006929 | -4,35 | 0 |
